# Supplementary material for: Deep Ensemble Learning for Retinal Image Classification
Source: PubMed Central journal article supplement — Transl Vis Sci Technol. 2022 Oct 28;11(10):39. doi: 10.1167/tvst.11.10.39 (PMC9624270; doi:10.1167/tvst.11.10.39), 2022-10-28
Supplement: tvst-11-10-39_s001.pdf [file tvst-11-10-39_s001.pdf]

## Supplementary Materials

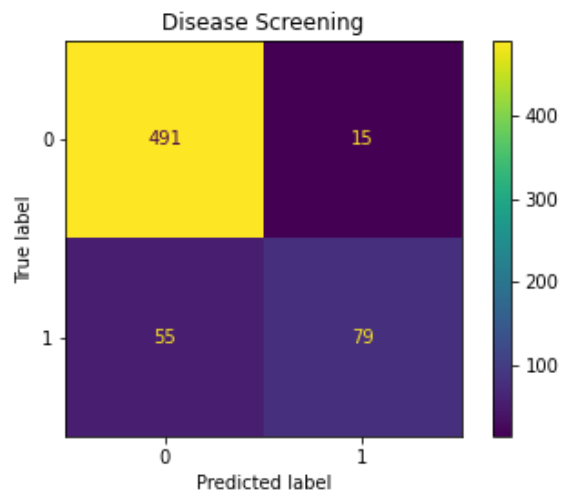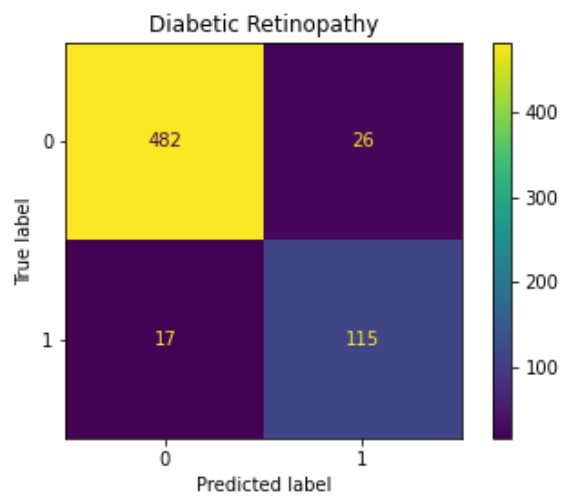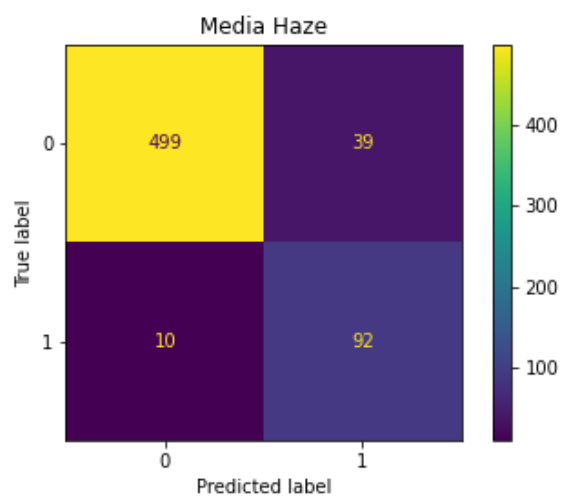

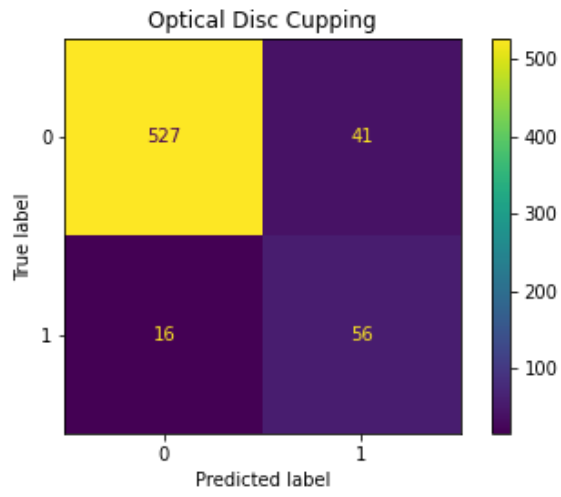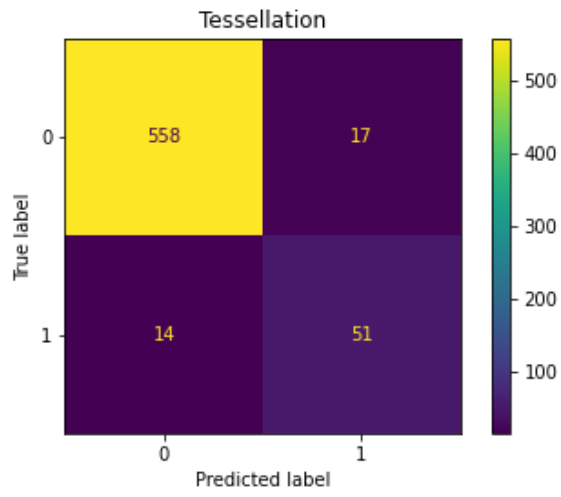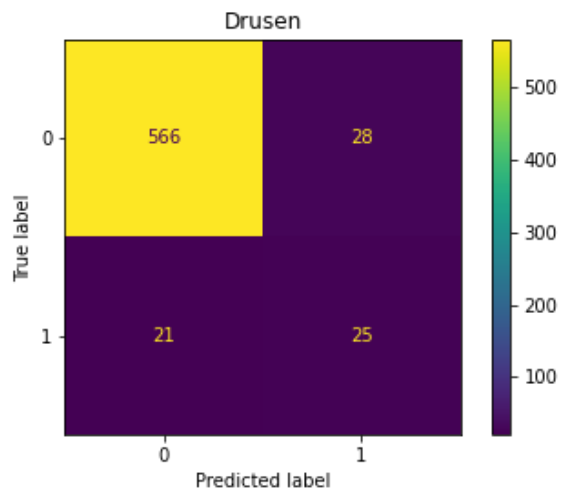

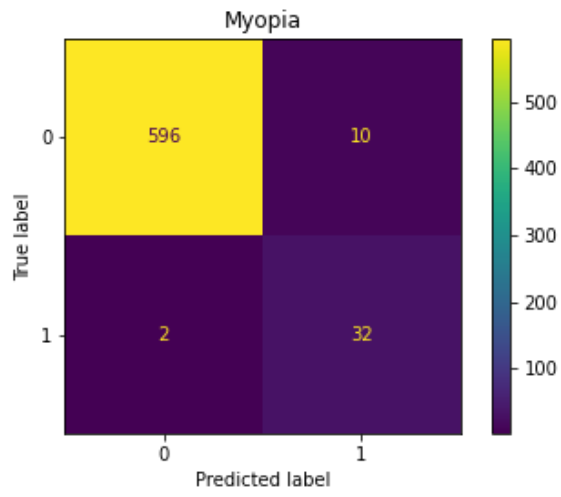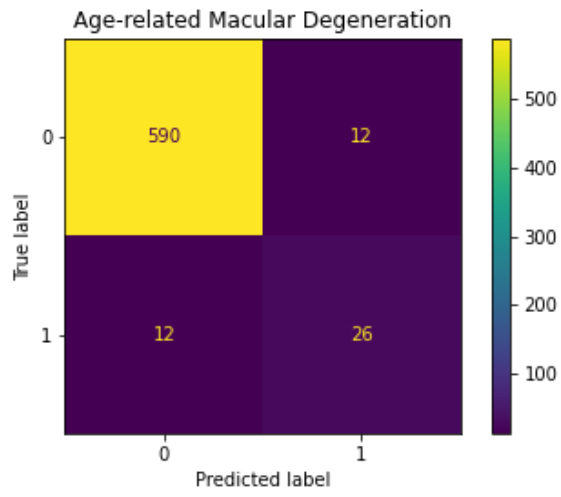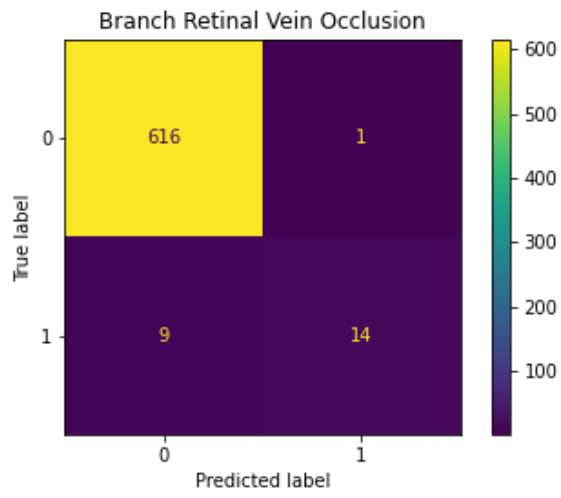

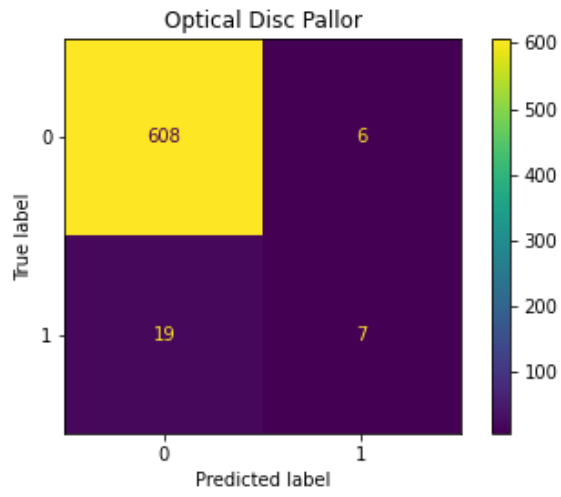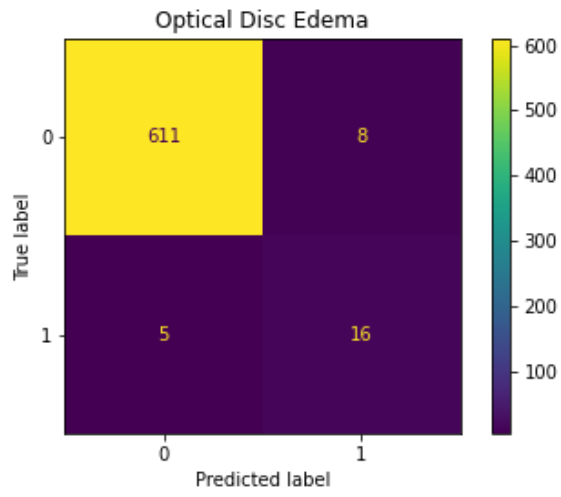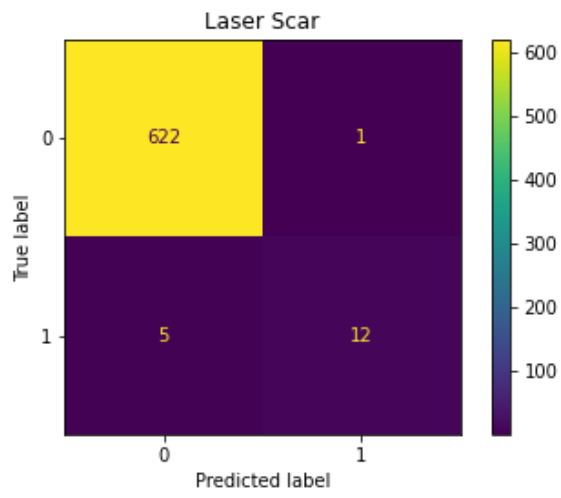

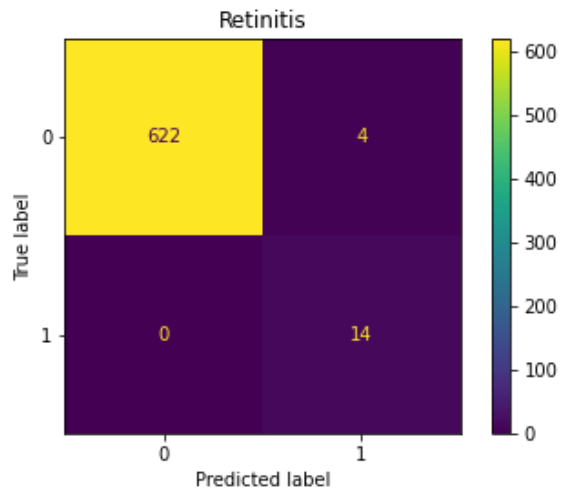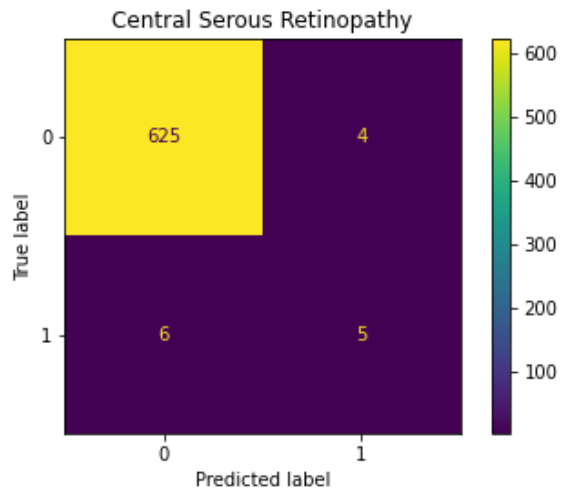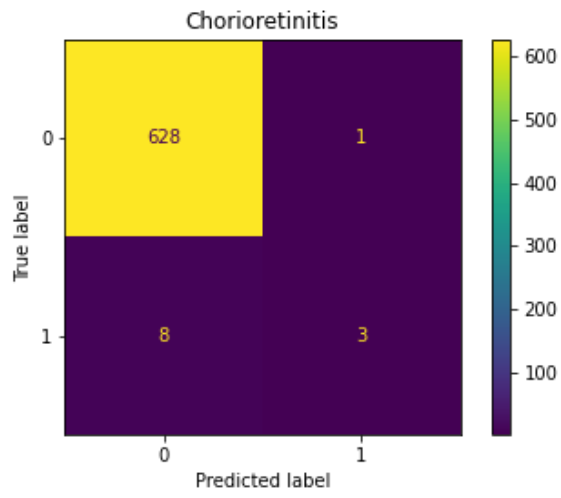

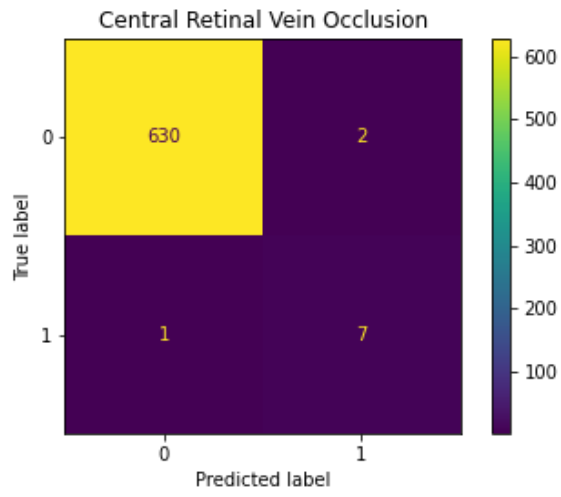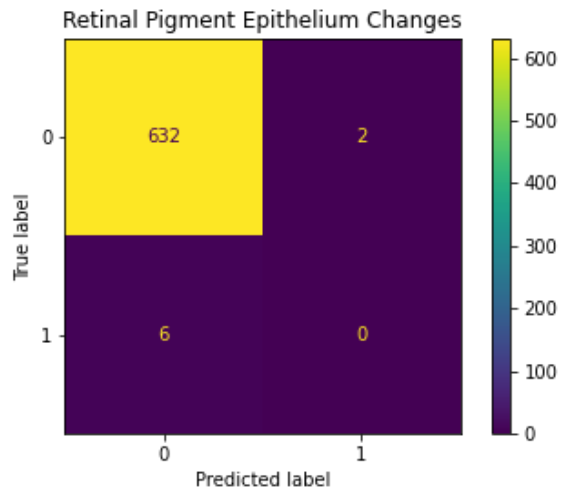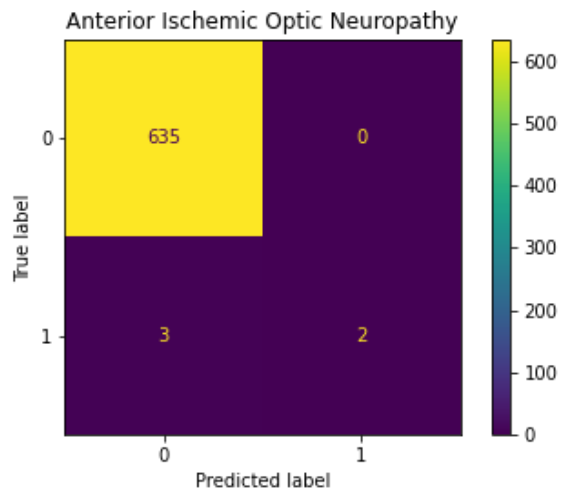

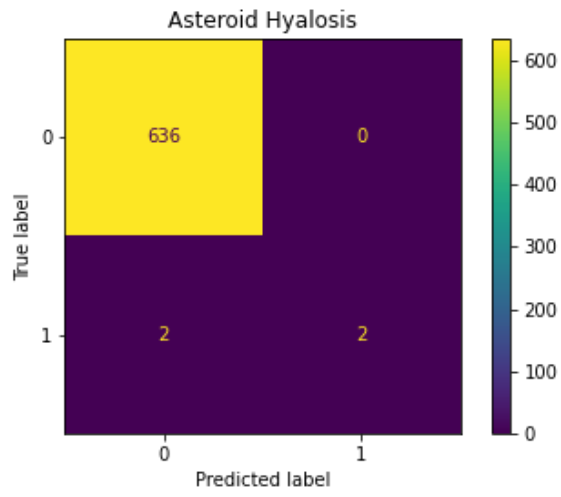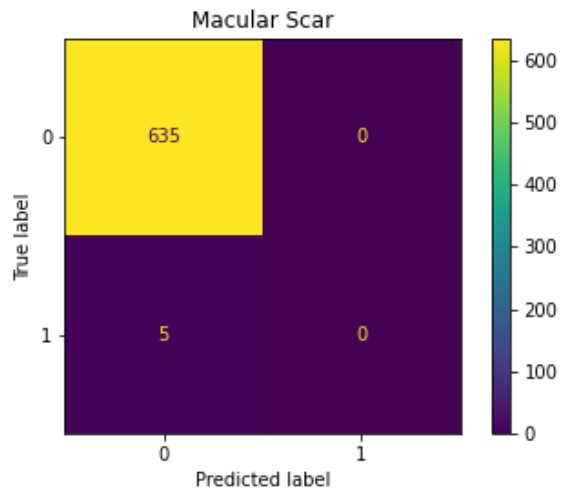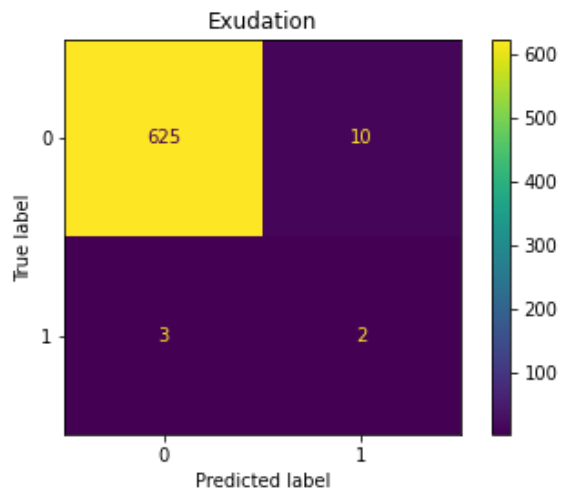

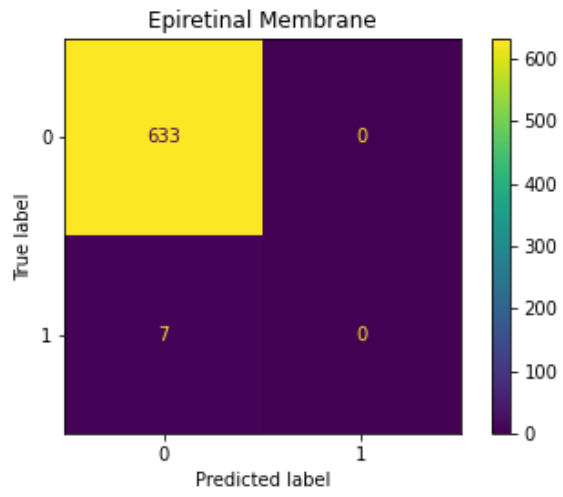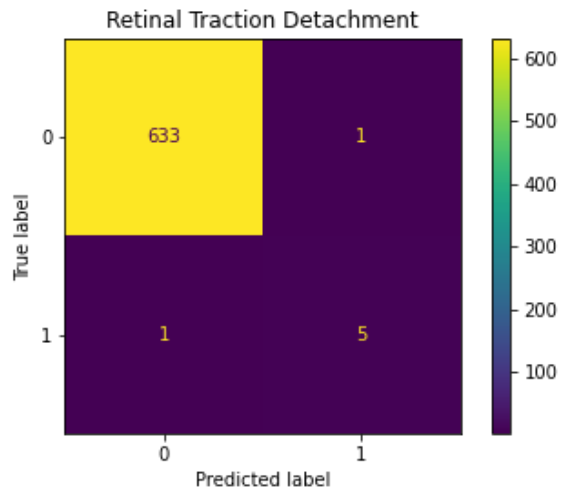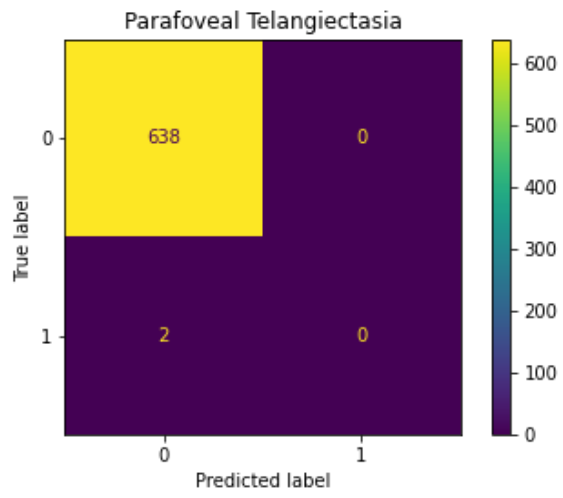



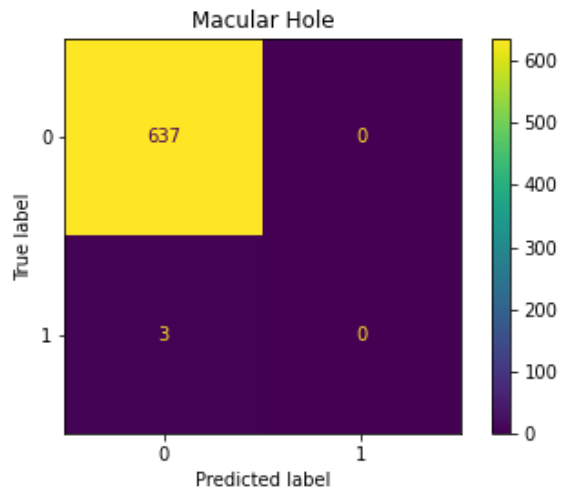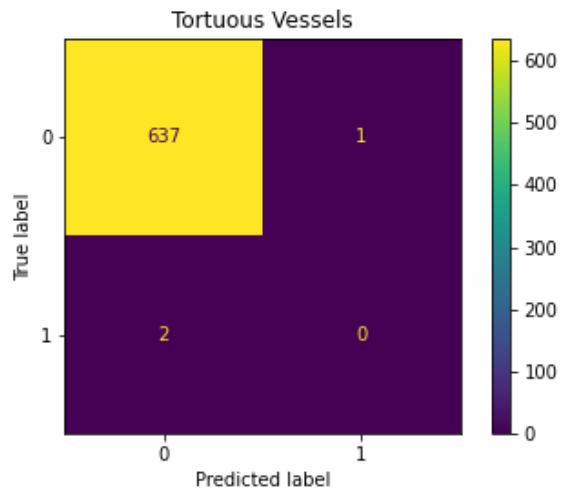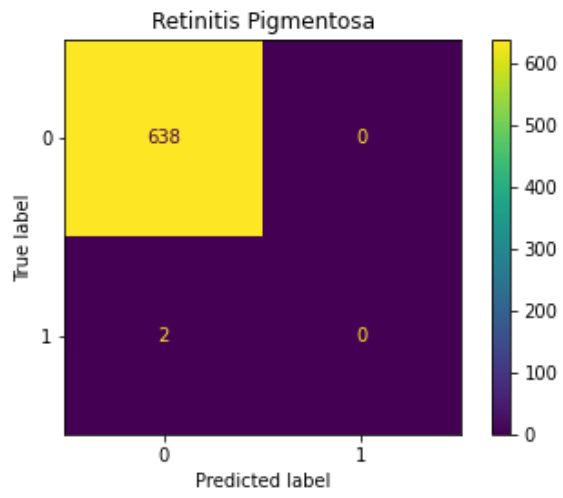

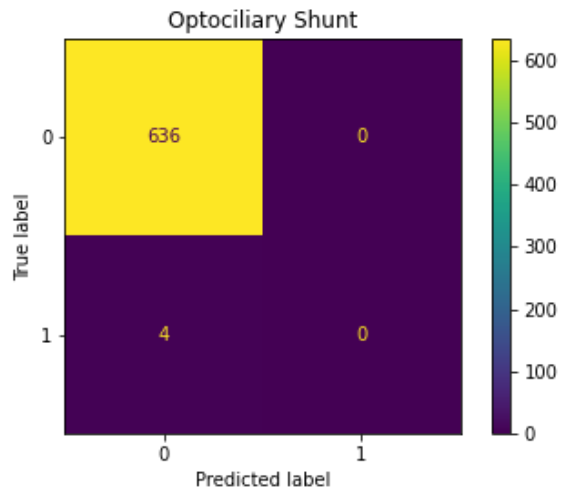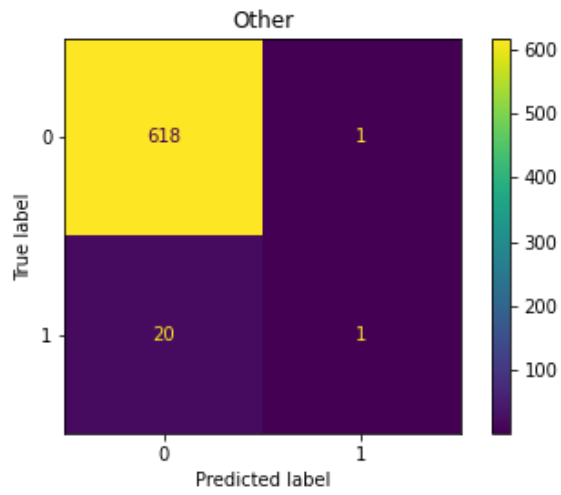

**Table S1.** Confusion matrices for disease screening (pathology versus no pathology) and for individual pathologies. The presence of pathology has a label of 1, and the absence of the pathology has a label of 0.
